# Supplementary material for: Adapting Clinical Chemistry Plasma as a Source for Liquid Biopsies
Source: eLife journal article supplement (doi:10.7554/elife.108708), 2025-10-21

Patient 12 Heparin separator

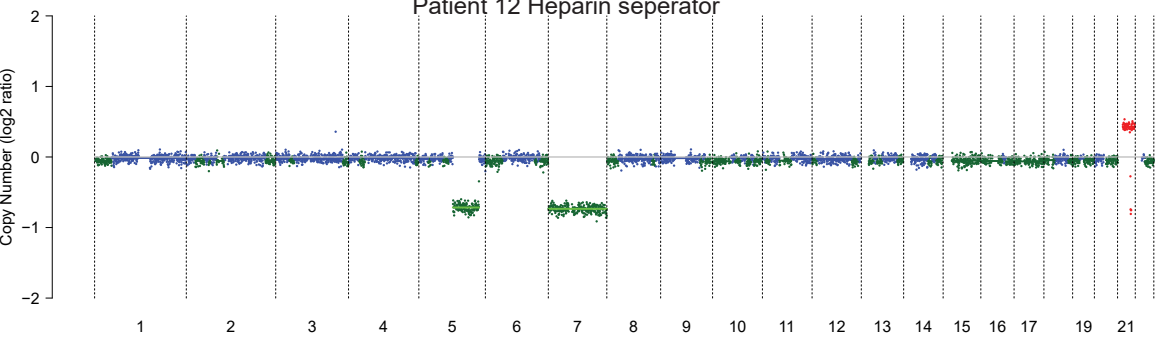

Patient 12 EDTA tube

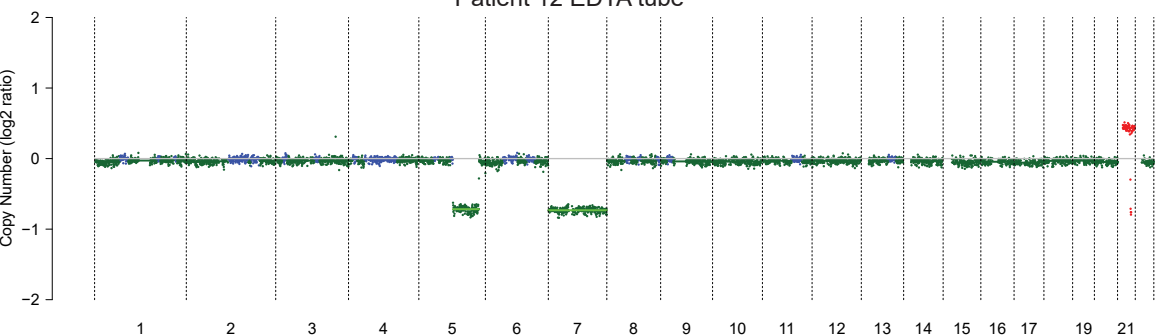

Patient 15 Heparin separator

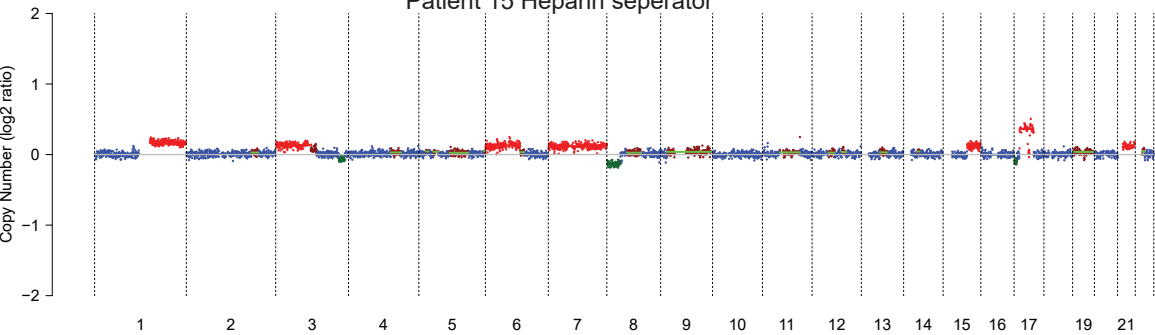

Patient 15 EDTA tube

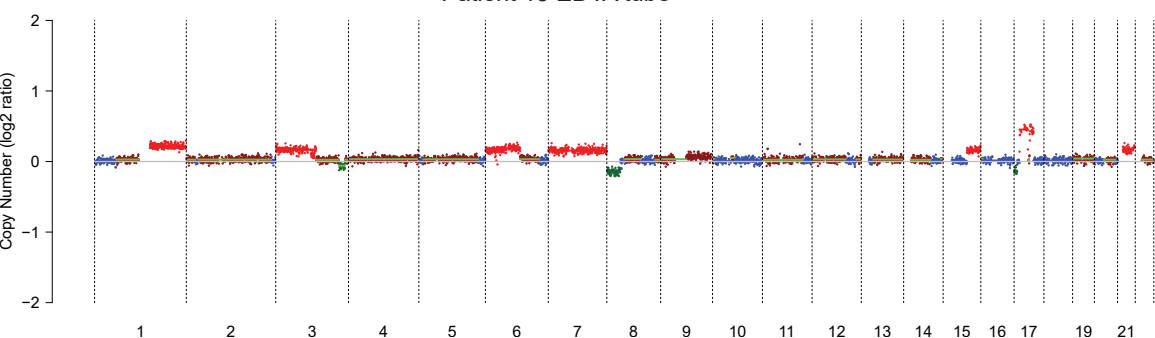

Patient 19 Heparin separator

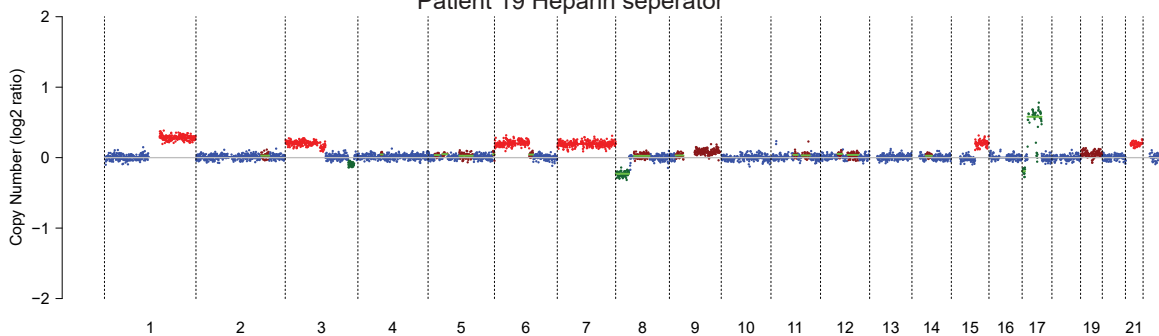

Patient 19 EDTA tube

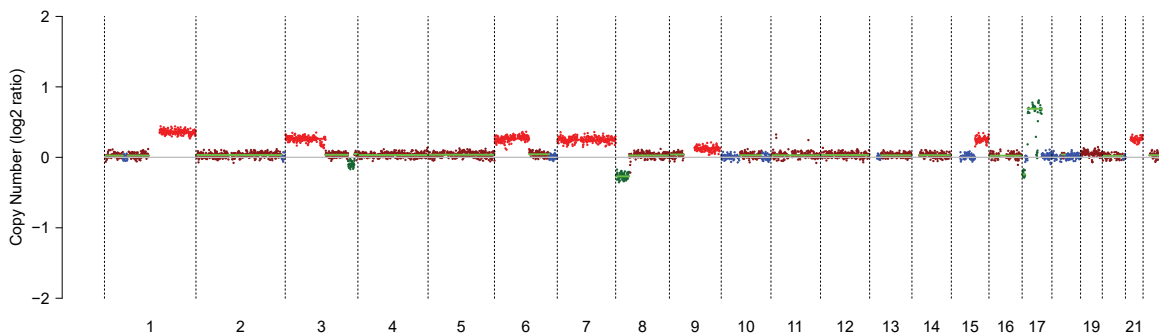

Patient 22 Heparin separator

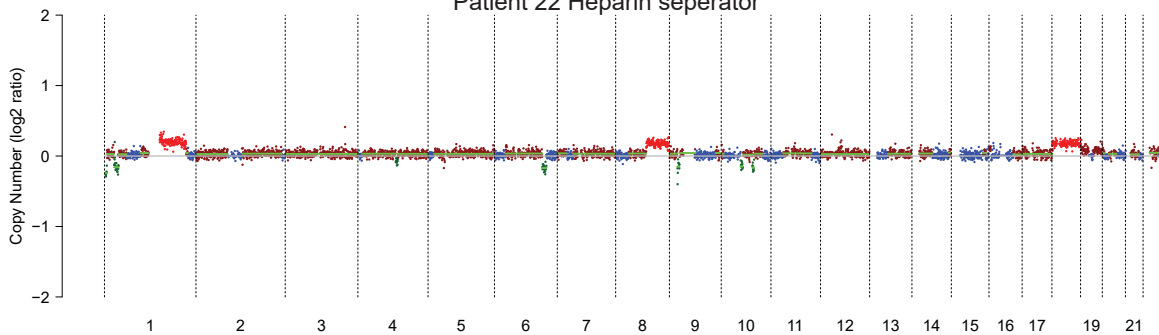

Patient 22 EDTA tube

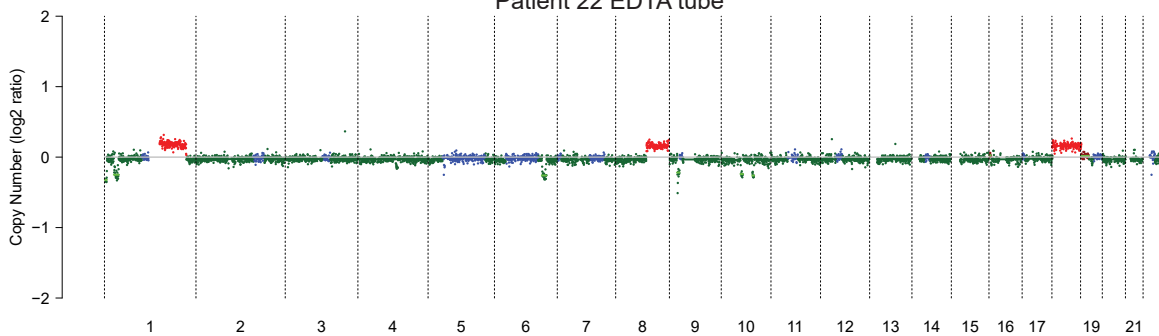

Patient 27 Heparin separator

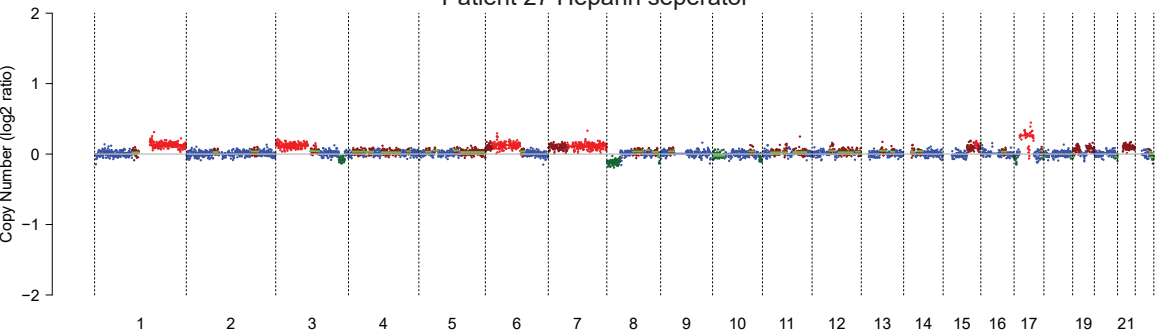

Patient 27 EDTA tube

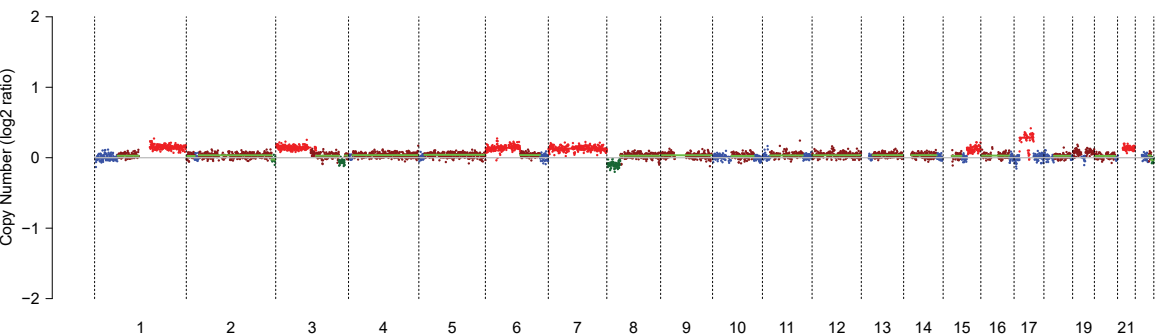

Supplement: supp3 [file elife-108708-supp3-v1.pdf]
