# Supplementary material for: Adapting clinical chemistry plasma as a source for liquid biopsies
Source: eLife. 2026 May 1;14:RP108708. doi: 10.7554/eLife.108708 (PMC13134851; doi:10.7554/eLife.108708)
Supplement: Supplementary file 1. [file elife-108708-supp1.xlsx]

## Sheet: Sheet1
Cohort	Insitute	Subject ID	Age	Sex	Sample ID	Tube type	Virus type	Time delay (between blood draw and first spin)	Averaged sequencin depth (WGS)	Averaged sequencin depth (FLEX-Seq)	Viral reads (log10 RPM)	Deduced tumor fraction
Healthy Cohort	Stanford	1	31-40	M	P140e	EDTA	/	0 min	4.87695		/	/
					P140h	Heparin separator	/	0 min	4.31558		/	/
					P140s	Streck	/	0 min	4.68772		/	/
Healthy Cohort	Stanford	2	21-30	F	P141e	EDTA	/	0 min	4.14788		/	/
					P141h	Heparin separator	/	0 min	4.23077		/	/
					P141s	Streck	/	0 min	4.82822		/	/
Healthy Cohort	Stanford	3	31-40	F	P142e	EDTA	/	0 min	5.56748		/	/
					P142h	Heparin separator	/	0 min	4.99994		/	/
					P142s	Streck	/	0 min	4.47147		/	/
Healthy Cohort	Stanford	4	21-30	F	P143e	EDTA	/	0 min	4.86604		/	/
					P143h	Heparin separator	/	0 min	4.70869		/	/
					P143s	Streck	/	0 min	4.23689		/	/
Healthy Cohort	Stanford	5	31-40	M	P144e	EDTA	/	0 min	5.12335		/	/
					P144h	Heparin separator	/	0 min	4.81302		/	/
					P144s	Streck	/	0 min	4.38818		/	/
Healthy Cohort	Stanford	6	41-50	M	Hep_gel_0min	Heparin separator	/	0 min	0.83106		/	/
					Hep_0min	Heparin tube	/	0 min	0.852418		/	/
					EDTA_0min	EDTA	/	0 min	0.799838		/	/
					Hep_gel_1h	Heparin separator	/	60 min	0.808935		/	/
					Hep_1h	Heparin tube	/	60 min	0.851919		/	/
					EDTA_1h	EDTA	/	60 min	0.936857		/	/
Hospital Cohort	Stanford	7	2025-11-20	M	P64	Heparin separator	EBV	15 min	0.303654	/	0.601408	0.0083
					P73	EDTA		45 min	2.84135	/	0	0.0336
Hospital Cohort	Stanford	8	2025-11-20	M	P65	Heparin separator	HHV6	19 min	0.305016	/	1.15422	0.0262
					P78	EDTA		44 min	0.32593	/	1.05486	0.0706
Hospital Cohort	Stanford	9	51-60	M	P69	Heparin separator	EBV	19 min	0.272824	/	2.48925	0.1095
					P76	EDTA		48 min	0.155634	/	2.37113	0.062
Hospital Cohort	Stanford	10	41-50	M	P71	Heparin separator	EBV	17 min	2.87893	/	0.122019	0.0286
					P75	EDTA		20 min	0.347231	/	0.0321673	0.0317
Hospital Cohort	Stanford	11	71-80	M	P95	Heparin separator	EBV	10 min	1.73932		1.6372	0.0326
					P104	EDTA		16 min	1.61429		1.65487	0.0167
Hospital Cohort	Stanford	12	61-70	M	P96	Heparin separator	EBV	14 min	0.787576	/	1.00899	0.4775
					P106	EDTA		21 min	5.63643	/	1.02001	0.4754
Hospital Cohort	Stanford	13	71-80	M	P98	Heparin separator	EBV	70 min	0.018443	/	1.94242	0.0374
					P105	EDTA		78 min	0.0150589	/	2.05635	0.0074
Hospital Cohort	Stanford	14	21-30	M	P99	Heparin separator	EBV	8 min	0.0113905		2.29738	0.1898
					P102	EDTA		17 min	0.0155601		2.27934	0.1374
Hospital Cohort	Stanford	15	71-80	M	P145	Heparin separator	EBV	11 min	4.72285	/	2.51643	0.0944
					P189	EDTA		27 min	4.41556	/	2.58841	0.201
Hospital Cohort	Stanford	16	51-60	M	P146	Heparin separator	CMV	41 min	4.13699	/	1.92556	0.0326
					P188	EDTA		42 min	5.23714	/	1.91646	0.0172
Hospital Cohort	Stanford	17	71-80	M	P149	Heparin separator	EBV	25 min	5.36022		0.860445	0.0404
					P174	EDTA		51 min	4.1733		0.821869	0.0296
Hospital Cohort	Stanford	18	51-60	M	P150	Heparin separator	CMV	9 min	4.41566		1.90504	0.0754
					P175	EDTA		10 min	4.09521		1.7163	0.0195
Hospital Cohort	Stanford	19	71-80	M	P152	Heparin separator	EBV	31 min	4.26473		2.5458	0.2737
					P190	EDTA		31 min	5.22438		2.61727	0.344
Hospital Cohort	Stanford	20	2025-11-20	F	P153	Heparin separator	EBV	10 min	5.46016		0.387483	0.0399
					P173	EDTA		60 min	5.31236		0.389445	0.0047
Hospital Cohort	Stanford	21	2025-11-20	M	P155	Heparin separator	EBV	131 min	4.10235	/	2.36473	0
					P176	EDTA		128 min	4.22458	/	2.45891	0
Hospital Cohort	Stanford	22	51-60	M	P157	Heparin separator	HHV6	21 min	3.71069		1.9707	0.2309
					P191	EDTA		21 min	4.74489		2.02705	0.0957
Hospital Cohort	Stanford	23	2025-11-20	M	P158	Heparin separator	HHV6	18 min	3.51455	/	2.60351	0.0707
					P192	EDTA		18 min	5.23185	/	2.76899	0.0251
Hospital Cohort	Stanford	24	31-40	M	P159	Heparin separator	HHV6	26 min	4.23687	/	2.1494	0
					P193	EDTA		25 min	4.56825	/	2.12249	0.0055
Hospital Cohort	Stanford	25	51-60	M	P160	Heparin separator	EBV	36 min	4.04347	/	2.2667	0.0442
					P177	EDTA		21 min	4.39035	/	2.26828	0.0336
Hospital Cohort	Stanford	26	61-70	M	P161	Heparin separator	EBV	34 min	4.42902		2.36922	0.0749
					P178	EDTA		33 min	4.79848		2.28622	0.0447
Hospital Cohort	Stanford	27	71-80	M	P162	Heparin separator	EBV	13 min	5.0057		2.23331	0.0836
					P179	EDTA		30 min	3.88111		2.22013	0.1676
Hospital Cohort	Stanford	28	31-40	M	P163	Heparin separator	EBV	9 min	4.81723	/	2.45701	0.0349
					P180	EDTA		14 min	4.51971	/	2.64914	0.0243
Hospital Cohort	Stanford	29	41-50	F	P164	Heparin separator	EBV	17 min	5.12793	/	1.89031	0.0478
					P182	EDTA		24 min	4.84291	/	2.27395	0.0613
Hospital Cohort	Stanford	30	71-80	F	P166	Heparin separator	EBV	30 min	4.30491		0.400585	0.0085
					P184	EDTA		24 min	4.34692		0.361133	0.0245
Hospital Cohort	Stanford	31	61-70	M	P168	Heparin separator	EBV	14 min	7.51887		0.169516	0
					P185	EDTA		42 min	5.03085		0.162305	0
Hospital Cohort	Stanford	32	51-60	M	P169	Heparin separator	EBV	15 min	7.18967	/	1.8564	0.0402
					P186	EDTA		19 min	5.22301	/	2.01379	0.0084
Hospital Cohort	Stanford	33	71-80	M	P170	Heparin separator	HHV6	41 min	4.40277	/	2.07113	0
					P194	EDTA		44 min	4.34747	/	2.12993	0.0254
Hospital Cohort	Stanford	34	41-50	F	P171	Heparin separator	EBV	12 min	4.28845		2.57615	0.4931
					P187	EDTA		34 min	3.83942		2.56806	0.582
Hospital Cohort	UCSF	35	/	/	UCSF7	Heparin separator	BK virus	/	/	/	0.672098	/
					UCSF1	EDTA		/	/	/	0.819544	/
Hospital Cohort	UCSF	36	/	/	UCSF8	Heparin separator	Mastadenovirus B	/	/	/	2.26245	/
					UCSF2	EDTA		/	/	/	2.26007	/
Hospital Cohort	UCSF	37	/	/	UCSF9	Heparin separator	TTV	/	/	/	0.39794	/
					UCSF3	EDTA		/	/	/	0.491362	/
Hospital Cohort	UCSF	38	/	/	UCSF10	Heparin separator	Mastadenovirus D	/	/	/	0	/
					UCSF4	EDTA		/	/	/	0.176091	/
Hospital Cohort	UCSF	39	/	/	UCSF11	Heparin separator	HHV6	/	/	/	1.89487	/
					UCSF5	EDTA		/	/	/	1.8451	/
Hospital Cohort	UCSF	40	/	/	UCSF12	Heparin separator	HHV4	/	/	/	0.863323	/
					UCSF6	EDTA		/	/	/	0.838849	/
Hospital Cohort	Stanford	41	2026-11-20	F	P538	Heparin separator	EBV	/	3.17		-1.22	0.0184
					P636	EDTA		/	5.44		-1.1	0.0053
Hospital Cohort	Stanford	42	41-50	M	P539	Heparin separator	EBV	/	2.89		-1.52	0.0781
					P637	EDTA		/	4.56		/	0.0369
Hospital Cohort	Stanford	43	0-10	M	P546	Heparin separator	EBV	/	2.62		0.45	0.0084
					P638	EDTA		/	5.58		-1.22	0.0053
Hospital Cohort	Stanford	44	21-30	F	P608	Heparin separator	EBV	/	5.78		-0.41	0.0438
					P639	EDTA		/	4.35		-0.44	0.0339
Healthy Cohort	Stanford	45	31-40	F	P526	EDTA & Heparin separator	/	See separate Supplementary Table 2 for detailed settings			/	/
Healthy Cohort	Stanford	46	21-30	M	P527	EDTA & Heparin separator	/				/	/
Healthy Cohort	Stanford	47	21-30	M	P528	EDTA & Heparin separator	/				/	/
Healthy Cohort	Stanford	48	31-40	F	P529	EDTA & Heparin separator	/				/	/
Healthy Cohort	Stanford	49	41-50	M	P530	EDTA & Heparin separator	/				/	/
Healthy Cohort	Stanford	50	31-40	M	P531	EDTA & Heparin separator	/				/	/
