# Supplementary material for: Adapting clinical chemistry plasma as a source for liquid biopsies
Source: eLife. 2026 May 1;14:RP108708. doi: 10.7554/eLife.108708 (PMC13134851; doi:10.7554/eLife.108708)
Supplement: Supplementary file 2. [file elife-108708-supp2.xlsx]

## Sheet: Sheet1
Patient ID	Sample ID	tube type	temperature group	delayed time group	blood collection	EDTA aliquot	4℃ (before soft spin)	soft spin (1600g 4 ℃)	hard spin (16000g 4℃)	plasma volume (uL)	extracted conc. (ng/uL)	normalized extraction conc. (ng/uL per mL plasma)
P526	P526_H0	Heparin separator	ice	immediate	2025-10-28 15:06:00	N/A	N/A	2025-10-28 15:53:00	2025-10-28 16:41:00	1200	0.10495	0.0874583
	P526_H4T1	Heparin separator	4 °C	1h	2025-10-28 15:06:00	N/A	2025-10-28 15:18:00	2025-10-28 16:17:00	2025-11-04 16:10:00	1300	0.1611	0.123923
	P526_H4T3	Heparin separator	4 °C	3h	2025-10-28 15:06:00	N/A	2025-10-28 15:22:00	2025-10-28 18:23:00	2025-11-04 16:10:00	1100	0.10475	0.0952273
	P526_H4T24	Heparin separator	4 °C	24h	2025-10-28 15:06:00	N/A	2025-10-28 15:18:00	2025-10-29 15:45:00	2025-11-05 15:40:00	1100	0.1882	0.171091
	P526_HRT1	Heparin separator	Room Temperature	1h	2025-10-28 15:06:00	N/A	N/A	2025-10-28 16:17:00	2025-11-04 15:45:00	1000	0.1346	0.1346
	P526_HRT2	Heparin separator	Room Temperature	2h	2025-10-28 15:06:00	N/A	N/A	2025-10-28 17:39:00	2025-11-04 16:10:00	1000	0.1349	0.1349
	P526_HRT3	Heparin separator	Room Temperature	3h	2025-10-28 15:06:00	N/A	N/A	2025-10-28 18:23:00	2025-11-04 15:45:00	1100	0.19935	0.181227
	P526_HRT24	Heparin separator	Room Temperature	24h	2025-10-28 15:06:00	N/A	N/A	2025-10-29 15:55:00	2025-11-05 15:40:00	1300	0.30275	0.232885
	P526_H37T24	Heparin separator	37 °C	24h	2025-10-28 15:06:00	N/A	N/A	2025-10-28 15:25:00	2025-10-29 15:55:00	1000	0.1401	0.1401
	P526_E0	EDTA	ice	immediate	2025-10-28 15:06:00	2025-10-28 15:40:00	N/A	2025-10-28 15:51:00	2025-10-28 16:41:00	900	0.07905	0.0878333
	P526_E4T24	EDTA	4 °C	24h	2025-10-28 15:06:00	2025-10-29 15:25:00	2025-10-28 15:20:00	2025-10-29 15:45:00	2025-11-05 15:40:00	1050	0.1852	0.176381
	P526_ERT1	EDTA	Room Temperature	1h	2025-10-28 15:06:00	2025-10-28 15:40:00	N/A	2025-10-28 16:17:00	2025-11-04 15:45:00	950	0.09435	0.0993158
	P526_ERT3	EDTA	Room Temperature	3h	2025-10-28 15:06:00	2025-10-28 15:40:00	N/A	2025-10-28 18:40:00	2025-11-04 15:45:00	1000	0.1481	0.1481
	P526_ERT24	EDTA	Room Temperature	24h	2025-10-28 15:06:00	2025-10-28 15:40:00	N/A	2025-10-29 15:40:00	2025-11-05 15:40:00	750	0.128	0.170667
P527	P527_H0	Heparin separator	ice	immediate	2025-10-28 15:11:00	N/A	N/A	2025-10-28 15:53:00	2025-10-28 16:41:00	1050	0.1005	0.0957143
	P527_H4T1	Heparin separator	4 °C	1h	2025-10-28 15:11:00	N/A	2025-10-28 15:18:00	2025-10-28 16:17:00	2025-11-04 16:10:00	900	0.11325	0.125833
	P527_H4T3	Heparin separator	4 °C	3h	2025-10-28 15:11:00	N/A	2025-10-28 15:22:00	2025-10-28 18:23:00	2025-11-04 16:10:00	1100	0.1632	0.148364
	P527_H4T24	Heparin separator	4 °C	24h	2025-10-28 15:11:00	N/A	2025-10-28 15:18:00	2025-10-29 15:45:00	2025-11-05 15:40:00	950	0.12635	0.133
	P527_HRT1	Heparin separator	Room Temperature	1h	2025-10-28 15:11:00	N/A	N/A	2025-10-28 16:17:00	2025-11-04 15:45:00	1000	0.1168	0.1168
	P527_HRT2	Heparin separator	Room Temperature	2h	2025-10-28 15:11:00	N/A	N/A	2025-10-28 17:39:00	2025-11-04 16:10:00	1100	0.1819	0.165364
	P527_HRT3	Heparin separator	Room Temperature	3h	2025-10-28 15:11:00	N/A	N/A	2025-10-28 18:23:00	2025-11-04 15:45:00	950	0.13145	0.138368
	P527_HRT24	Heparin separator	Room Temperature	24h	2025-10-28 15:11:00	N/A	N/A	2025-10-29 15:55:00	2025-11-05 15:40:00	1000	0.272	0.272
	P527_H37T24	Heparin separator	37 °C	24h	2025-10-28 15:11:00	N/A	N/A	2025-10-28 15:25:00	2025-10-29 15:55:00	950	0.1618	0.170316
	P527_E0	EDTA	ice	immediate	2025-10-28 15:11:00	2025-10-28 15:44:00	N/A	2025-10-28 15:51:00	2025-10-28 16:41:00	850	0.0719	0.0845882
	P527_E4T24	EDTA	4 °C	24h	2025-10-28 15:11:00	2025-10-29 15:25:00	2025-10-28 15:20:00	2025-10-29 15:45:00	2025-11-05 15:40:00	850	0.1055	0.124118
	P527_ERT1	EDTA	Room Temperature	1h	2025-10-28 15:11:00	2025-10-28 15:44:00	N/A	2025-10-28 16:17:00	2025-11-04 15:45:00	900	0.06835	0.0759444
	P527_ERT3	EDTA	Room Temperature	3h	2025-10-28 15:11:00	2025-10-28 15:44:00	N/A	2025-10-28 18:40:00	2025-11-04 15:45:00	750	0.05335	0.0711333
	P527_ERT24	EDTA	Room Temperature	24h	2025-10-28 15:11:00	2025-10-28 15:44:00	N/A	2025-10-29 15:40:00	2025-11-05 15:40:00	750	0.0636	0.0848
P528	P528_H0	Heparin separator	ice	immediate	2025-10-28 15:24:00	N/A	N/A	2025-10-28 15:53:00	2025-10-28 16:41:00	950	0.0824	0.0867368
	P528_H4T1	Heparin separator	4 °C	1h	2025-10-28 15:24:00	N/A	2025-10-28 15:29:00	2025-10-28 16:29:00	2025-11-04 16:10:00	900	0.0796	0.0884444
	P528_H4T24	Heparin separator	4 °C	24h	2025-10-28 15:24:00	N/A	2025-10-28 15:29:00	2025-10-29 15:45:00	2025-11-05 15:40:00	900	0.08325	0.0925
	P528_HRT1	Heparin separator	Room Temperature	1h	2025-10-28 15:24:00	N/A	N/A	2025-10-28 16:29:00	2025-11-04 15:45:00	950	0.08205	0.0863684
	P528_HRT3	Heparin separator	Room Temperature	3h	2025-10-28 15:24:00	N/A	N/A	2025-10-28 18:35:00	2025-11-04 15:45:00	800	0.0748	0.0935
	P528_HRT24	Heparin separator	Room Temperature	24h	2025-10-28 15:24:00	N/A	N/A	2025-10-29 15:55:00	2025-11-05 15:40:00	900	0.271	0.301111
	P528_E0	EDTA	ice	immediate	2025-10-28 15:24:00	2025-10-28 15:45:00	N/A	2025-10-28 15:51:00	2025-10-28 16:41:00	750	0.0605	0.0806667
	P528_ERT1	EDTA	Room Temperature	1h	2025-10-28 15:24:00	2025-10-28 15:45:00	N/A	2025-10-28 16:29:00	2025-11-04 15:45:00	700	0.07505	0.107214
	P528_ERT3	EDTA	Room Temperature	3h	2025-10-28 15:24:00	2025-10-28 15:45:00	N/A	2025-10-28 18:40:00	2025-11-04 15:45:00	550	0.07325	0.133182
	P528_ERT24	EDTA	Room Temperature	24h	2025-10-28 15:24:00	2025-10-28 15:45:00	N/A	2025-10-29 15:40:00	2025-11-05 15:40:00	550	0.12365	0.224818
P529	P529_H0	Heparin separator	ice	immediate	2025-10-28 15:17:00	N/A	N/A	2025-10-28 15:53:00	2025-10-28 16:41:00	1050	0.11645	0.110905
	P529_H4T1	Heparin separator	4 °C	1h	2025-10-28 15:17:00	N/A	2025-10-28 15:27:00	2025-10-28 16:29:00	2025-11-04 16:10:00	1050	0.06125	0.0583333
	P529_H4T24	Heparin separator	4 °C	24h	2025-10-28 15:17:00	N/A	2025-10-28 15:27:00	2025-10-29 15:45:00	2025-11-05 15:40:00	1100	0.07345	0.0667727
	P529_HRT1	Heparin separator	Room Temperature	1h	2025-10-28 15:17:00	N/A	N/A	2025-10-28 16:17:00	2025-11-04 15:45:00	1050	0.0729	0.0694286
	P529_HRT3	Heparin separator	Room Temperature	3h	2025-10-28 15:17:00	N/A	N/A	2025-10-28 18:23:00	2025-11-04 15:45:00	1050	0.0625	0.0595238
	P529_HRT24	Heparin separator	Room Temperature	24h	2025-10-28 15:17:00	N/A	N/A	2025-10-29 15:55:00	2025-11-05 15:40:00	1100	0.17815	0.161955
	P529_E0	EDTA	ice	immediate	2025-10-28 15:17:00	2025-10-28 15:47:00	N/A	2025-10-28 15:51:00	2025-10-28 16:41:00	900	0.040825	0.0453611
	P529_ERT1	EDTA	Room Temperature	1h	2025-10-28 15:17:00	2025-10-28 15:47:00	N/A	2025-10-28 16:17:00	2025-11-04 15:45:00	900	0.043955	0.0488389
	P529_ERT3	EDTA	Room Temperature	3h	2025-10-28 15:17:00	2025-10-28 15:47:00	N/A	2025-10-28 18:40:00	2025-11-04 15:45:00	900	0.043485	0.0483167
	P529_ERT24	EDTA	Room Temperature	24h	2025-10-28 15:17:00	2025-10-28 15:47:00	N/A	2025-10-29 15:40:00	2025-11-05 15:40:00	850	0.08755	0.103
P530	P530_H0	Heparin separator	ice	immediate	2025-10-28 15:36:00	N/A	N/A	2025-10-28 15:53:00	2025-10-28 16:41:00	1050	0.1756	0.167238
	P530_H4T1	Heparin separator	4 °C	1h	2025-10-28 15:36:00	N/A	2025-10-28 15:41:00	2025-10-28 16:29:00	2025-11-04 16:10:00	1050	0.1797	0.171143
	P530_H4T24	Heparin separator	4 °C	24h	2025-10-28 15:36:00	N/A	2025-10-28 15:41:00	2025-10-29 15:45:00	2025-11-05 15:40:00	1200	0.2499	0.20825
	P530_HRT1	Heparin separator	Room Temperature	1h	2025-10-28 15:36:00	N/A	N/A	2025-10-28 16:29:00	2025-11-04 15:45:00	1050	0.24575	0.234048
	P530_HRT3	Heparin separator	Room Temperature	3h	2025-10-28 15:36:00	N/A	N/A	2025-10-28 18:35:00	2025-11-04 15:45:00	1000	0.266	0.266
	P530_HRT24	Heparin separator	Room Temperature	24h	2025-10-28 15:36:00	N/A	N/A	2025-10-29 15:55:00	2025-11-05 15:40:00	1000	0.3014	0.3014
	P530_E0	EDTA	ice	immediate	2025-10-28 15:36:00	2025-10-28 15:48:00	N/A	2025-10-28 15:51:00	2025-10-28 16:41:00	850	0.13505	0.158882
	P530_E4T24	EDTA	4 °C	24h	2025-10-28 15:36:00	N/A	?	2025-10-29 15:45:00	2025-11-05 15:40:00	1000	0.1801	0.1801
	P530_ERT1	EDTA	Room Temperature	1h	2025-10-28 15:36:00	2025-10-28 15:48:00	N/A	2025-10-28 16:29:00	2025-11-04 15:45:00	850	0.1279	0.150471
	P530_ERT3	EDTA	Room Temperature	3h	2025-10-28 15:36:00	2025-10-28 15:48:00	N/A	2025-10-28 18:40:00	2025-11-04 15:45:00	800	0.13075	0.163438
	P530_ERT24	EDTA	Room Temperature	24h	2025-10-28 15:36:00	2025-10-28 15:48:00	N/A	2025-10-29 15:40:00	2025-11-05 15:40:00	850	0.2786	0.327765
P531	P531_H0	Heparin separator	ice	immediate	2025-10-28 15:29:00	N/A	N/A	2025-10-28 15:53:00	2025-10-28 16:41:00	900	0.1852	0.205778
	P531_H4T1	Heparin separator	4 °C	1h	2025-10-28 15:29:00	N/A	2025-10-28 15:33:00	2025-10-28 16:29:00	2025-11-04 16:10:00	850	0.19435	0.228647
	P531_H4T24	Heparin separator	4 °C	24h	2025-10-28 15:29:00	N/A	2025-10-28 15:33:00	2025-10-29 15:45:00	2025-11-05 15:40:00	1000	0.2977	0.2977
	P531_HRT1	Heparin separator	Room Temperature	1h	2025-10-28 15:29:00	N/A	N/A	2025-10-28 16:29:00	2025-11-04 15:45:00	950	0.31835	0.335105
	P531_HRT3	Heparin separator	Room Temperature	3h	2025-10-28 15:29:00	N/A	N/A	2025-10-28 18:35:00	2025-11-04 15:45:00	1000	0.31385	0.31385
	P531_HRT24	Heparin separator	Room Temperature	24h	2025-10-28 15:29:00	N/A	N/A	2025-10-29 15:55:00	2025-11-05 15:40:00	1000	0.27145	0.27145
	P531_E0	EDTA	ice	immediate	2025-10-28 15:29:00	2025-10-28 15:50:00	N/A	2025-10-28 15:51:00	2025-10-28 16:41:00	700	0.14445	0.206357
	P531_ERT1	EDTA	Room Temperature	1h	2025-10-28 15:29:00	2025-10-28 15:50:00	N/A	2025-10-28 16:29:00	2025-11-04 15:45:00	750	0.1398	0.1864
	P531_ERT3	EDTA	Room Temperature	3h	2025-10-28 15:29:00	2025-10-28 15:50:00	N/A	2025-10-28 18:40:00	2025-11-04 15:45:00	650	0.1219	0.187538
	P531_ERT24	EDTA	Room Temperature	24h	2025-10-28 15:29:00	2025-10-28 15:50:00	N/A	2025-10-29 15:40:00	2025-11-05 15:40:00	700	0.2516	0.359429
